# Supplementary material
Source: Preprints.org preprint supplement (doi:10.20944/preprints201912.0306.v1)
Supplement: Supplementary file 1 [file supplementary]

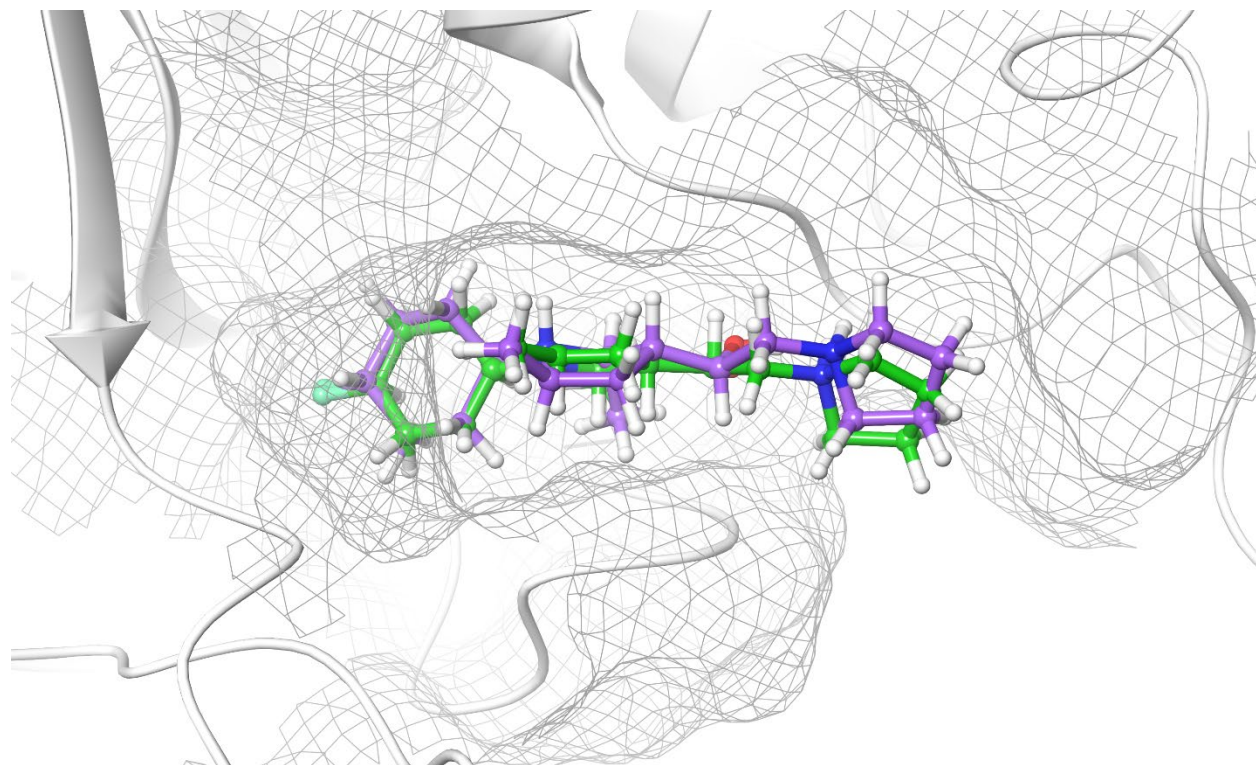

**Supplementary Figure 1.** Validation of the docking protocol. Co-crystal ligand (green) and after docking with Glide XP (purple). 1.7 Å RMSD value was obtained between the co-ligand pose and redocked pose. The binding site shown in a mesh representation (grey).
